# Supplementary material
Source: PubMed Central journal article supplement (PMC3721110)
Supplement: ismej201339x1.pdf [file ismej201339x1.pdf]

**Table S1.** Sequences and coverage (based on SILVA release 111, 27 July 2012) of probes used in this study. Hybridization condition and target groups are given in Table 1. \* Numbers of sequence with perfect match to the probe, in brackets numbers of sequences in target group.

| <b>Probe name</b> | <b>Sequence (5'→3')</b>     | <b>reference</b>           | <b>SILVA 111 coverage*</b> |
|-------------------|-----------------------------|----------------------------|----------------------------|
| Euk516            | ACC AGA CTT GCC CTC C       | Amann et al 1990           | 59123<br>(71787)           |
| Chlo02            | CTT CGA GCC CCC AAC TTT     | Simon et al 2000           | 3169 (3519)                |
| CryptB            | ACG GCC CCA ACT GTC CCT     | Metfies and Medlin 2007    | 268 (303)                  |
| Bolido02          | TAC CTA GGT ACG CAA ACC     | Guillou et al 1999b        | 17 (21)                    |
| Prym02            | GGA ATA CGA GTG CCC CTG AC  | Simon et al 2000           | 397 (418)                  |
| Pavlova01         | CAC CTC TCT CTA CGG AAT     | Eller et al 2007           | 89 (94)                    |
| Phaeo02           | TCG GCA GAC CGC TCG GCC CG  | Zingone et al 1999         | 41 (44)                    |
| Ped675            | TCA CAG TAA ACG ACA GGC GT  | Piwosz and Pernthaler 2010 | 29 (34)                    |
| NS1A              | ATT ACC TCG ATC CGC AAA     | Massana et al 2006         | 9 (11)                     |
| NS1B              | AAC GCA AGT CTC CCC GCG     | Massana et al 2006         | 5 (5)                      |
| NS1C              | GTG TTC CCT AAC CCC GAC     | Massana et al 2006         | 25 (29)                    |
| NS2               | CGG GTC CCG AGC ACG ACA     | Massana et al 2006         | 9 (10)                     |
| MAST-6            | CCA AAG CAG TTG GGA GTT AAC | Piwosz and Pernthaler 2010 | 2 (6)                      |
| Alv01             | GCC TGC CGT GAA CAC TCT     | Chambouvet et al 2008      | 409 (716)                  |
