# Supplementary material
Source: PubMed Central journal article supplement (PMC3721110)
Supplement: ismej201339x2.pdf [file ismej201339x2.pdf]

**Table S2.** Values of environmental variables measured at 13 first-year sea ice stations, Canadian Arctic Archipelago. nd - no data

| region            | Station | Ice thickness | Ice type       | Snow cover | Total Chl <i>a</i>    |                       | Chl <i>a</i> > 5 $\mu\text{m}$ |                       | Sea ice<br>Bacterial numbers              |                                           | NO <sub>2</sub>         | NO <sub>3</sub>         | PO <sub>4</sub>         | SiOH <sub>4</sub>       | underlying sea water |                 |                 |                   |
|-------------------|---------|---------------|----------------|------------|-----------------------|-----------------------|--------------------------------|-----------------------|-------------------------------------------|-------------------------------------------|-------------------------|-------------------------|-------------------------|-------------------------|----------------------|-----------------|-----------------|-------------------|
|                   | #       | (cm)          |                | (cm)       | (mg m <sup>-2</sup> ) | (mg m <sup>-3</sup> ) | (mg m <sup>-2</sup> )          | (mg m <sup>-3</sup> ) | (10 <sup>12</sup> cells m <sup>-2</sup> ) | (10 <sup>14</sup> cells m <sup>-3</sup> ) | (mmol m <sup>-3</sup> ) | NO <sub>2</sub>      | NO <sub>3</sub> | PO <sub>4</sub> | SiOH <sub>4</sub> |
| Barrow Strait     | 1       | 77            | drift pack ice | 5          | 0.8                   | 38.9                  | 0.73                           | 35.8                  | 6.4                                       | 3.2                                       | nd                      | 2.1                     | 0.7                     | 2.3                     | 0.06                 | 3.3             | 0.8             | 7.9               |
|                   | 2       | 133           |                | 6          | 0.6                   | 28.9                  | 0.50                           | 22.9                  | 5.2                                       | 2.4                                       | 0.08                    | 1.1                     | 0.5                     | 2.7                     | 0.13                 | 1.0             | 1.0             | 5.0               |
|                   | 3       | 103           |                | 5          | 1.5                   | 64.9                  | 0.73                           | 30.8                  | 5.0                                       | 2.1                                       | 0.07                    | 0.3                     | 1.0                     | 1.5                     | 0.20                 | 1.2             | 1.0             | 5.1               |
| Cornwallis Island | 4       | 144           | land-fast ice  | 15         | 59.5                  | 2072.8                | 52.89                          | 1842.0                | 89.6                                      | 31.2                                      | nd                      | nd                      | nd                      | nd                      | 0.07                 | 7.6             | 1.2             | 13.5              |
|                   | 5       | 142           |                | 25         | 18.9                  | 901.2                 | 3.73                           | 178.1                 | 78.9                                      | 37.6                                      | nd                      | nd                      | nd                      | nd                      | 0.08                 | 8.2             | 1.2             | 14.3              |
|                   | 6       | 140           |                | 16         | 28.2                  | 1791.6                | 27.95                          | 1778.3                | 80.9                                      | 51.5                                      | 0.03                    | nd                      | 5.5                     | 2.4                     | 0.08                 | 7.8             | 0.9             | 13.8              |
|                   | 7       | 150           |                | 8          | 19.1                  | 1216.4                | 20.26                          | 1289.1                | 73.5                                      | 46.7                                      | 0.07                    | 5.9                     | 7.7                     | 9.1                     | 0.08                 | 9.3             | 1.3             | 15.1              |
|                   | 8       | 164           |                | 4          | 27.8                  | 1011.5                | 27.82                          | 1219.7                | 170.8                                     | 62.1                                      | nd                      | 9.4                     | 15.2                    | 21.0                    | 0.08                 | 8.7             | 1.2             | 14.5              |
|                   | 9       | 189           |                | 2          | 22.2                  | 1057.2                | 22.16                          | 1062.4                | 108.1                                     | 51.6                                      | 0.09                    | 7.7                     | 13.8                    | 6.6                     | 0.12                 | 8.0             | 1.2             | 13.9              |
|                   | 10      | 140           |                | 14         | 43.4                  | 2438.8                | 42.17                          | 2367.2                | 136.5                                     | 76.6                                      | nd                      | nd                      | 12.6                    | nd                      | 0.07                 | 8.1             | 1.2             | 15.3              |
|                   | 11      | 138           |                | 21         | 51.7                  | 2244.4                | 53.54                          | 2322.1                | 113.4                                     | 49.2                                      | nd                      | nd                      | 6.4                     | 5.1                     | 0.05                 | 8.4             | 1.2             | 14.3              |
|                   | 12      | 141           |                | 5          | 10.3                  | 392.7                 | 10.05                          | 355.7                 | 35.6                                      | 13.6                                      | 0.03                    | 6.9                     | 2.6                     | 2.9                     | 0.05                 | 9.3             | 1.3             | 15.9              |
|                   | 13      | 155           |                | 7          | 13.5                  | 513.9                 | 12.27                          | 468.5                 | 60.3                                      | 23.0                                      | 0.04                    | 3.8                     | 3.6                     | 4.7                     | 0.08                 | 9.0             | 1.2             | 15.6              |
